# Supplementary material for: Dam type and lake location characterize ice-marginal lake area change in Alaska and NW Canada between 1984 and 2019
Source: Copernicus journal article supplement (doi:10.5194/tc-16-297-2022), 2022-01-25
Supplement: Supplementary file 1 [file tc-16-297-2022-supplement.pdf]

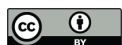

*Supplement of*

## **Dam type and lake location characterize ice-marginal lake area change in Alaska and NW Canada between 1984 and 2019**

**Brianna Rick et al.**

*Correspondence to:* Brianna Rick ([brianna.rick@colostate.edu](mailto:brianna.rick@colostate.edu))

The copyright of individual parts of the supplement might differ from the article licence.

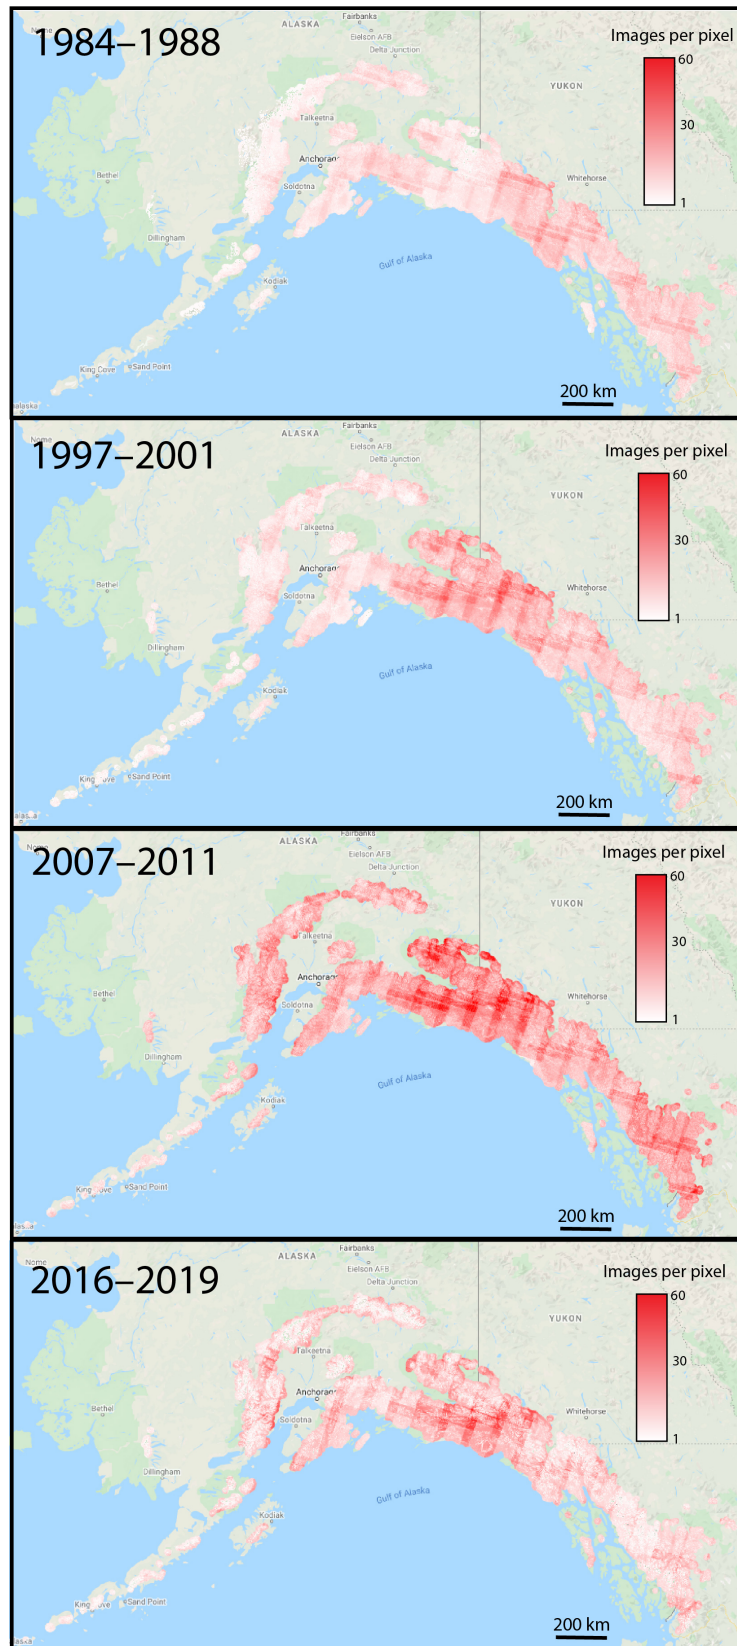

**Fig. S1.** Images per pixel per time period for each mosaic (median of each pixel value) used in analysis. Maps created in © Google Earth Engine (Gorelick et al., 2017).

a) "Lakes" from classification

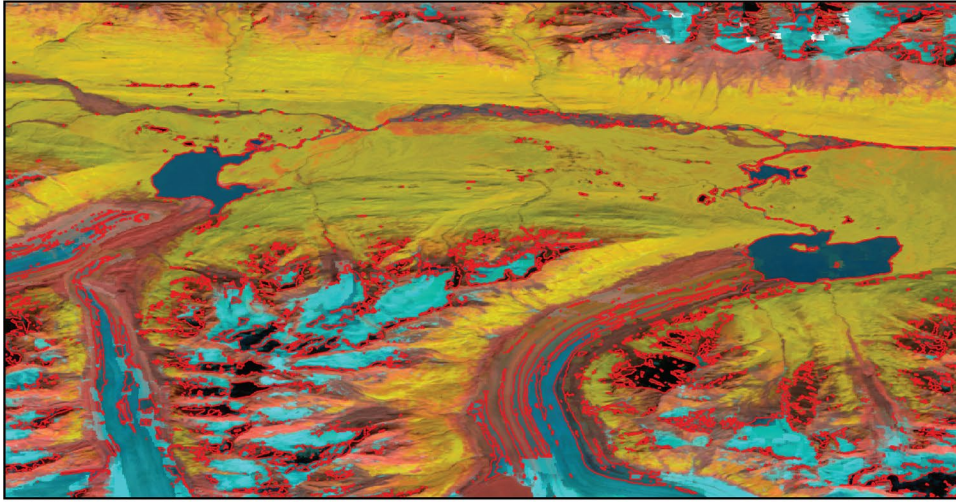

b) "Lakes" after thresholding

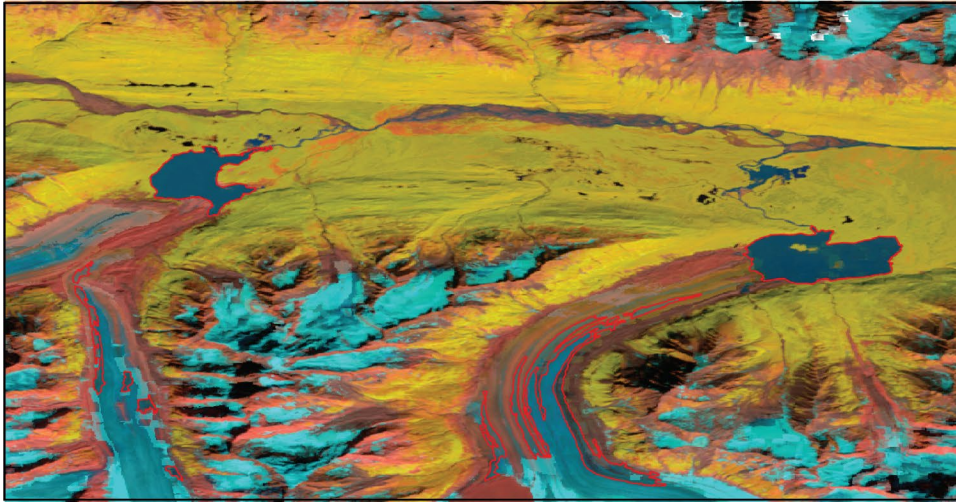

c) Final lake outlines after manual cleaning

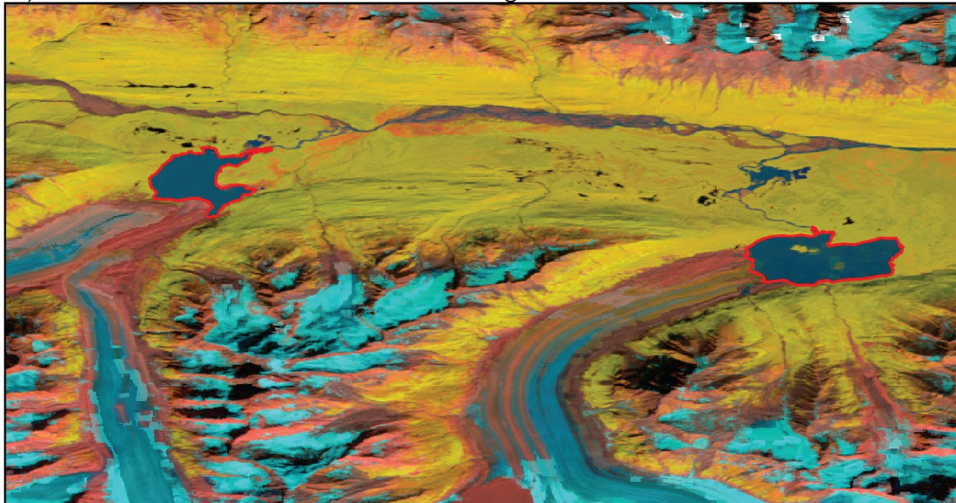

**Fig. S2.** Example of lake polygons after supervised classification (a), after applying slope, area, distance, and length:area ratio thresholds (b), and after manual verification. Polygon outlines are in red. False color images using Landsat bands for shortwave infrared (SWIR), near infrared (NIR), and red.

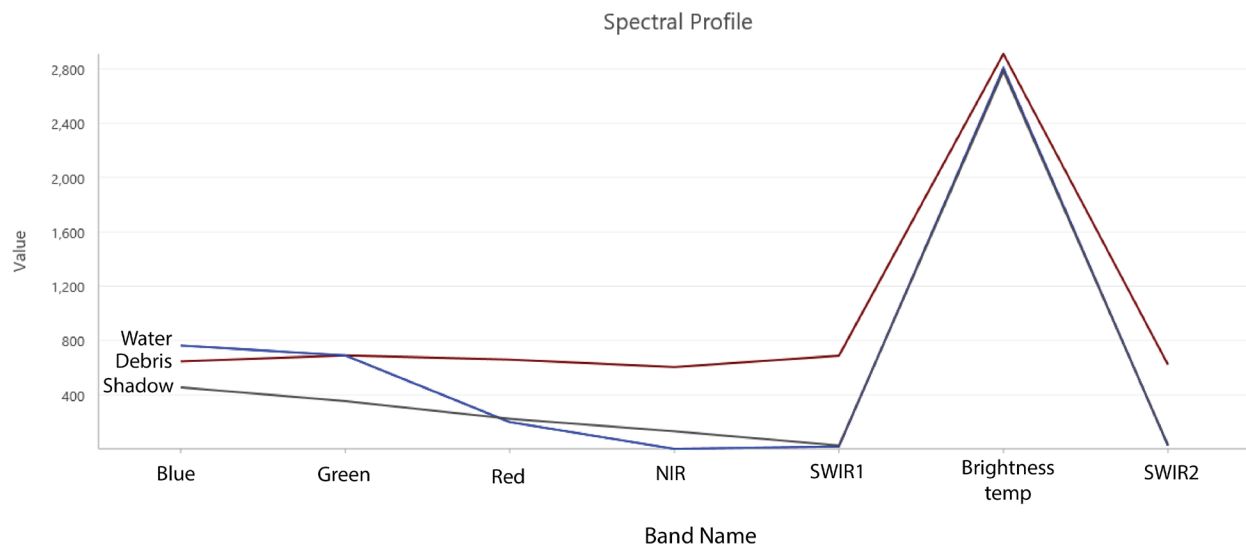

**Fig. S3.** Spectral comparison of water, mountain shadow, and a debris band.

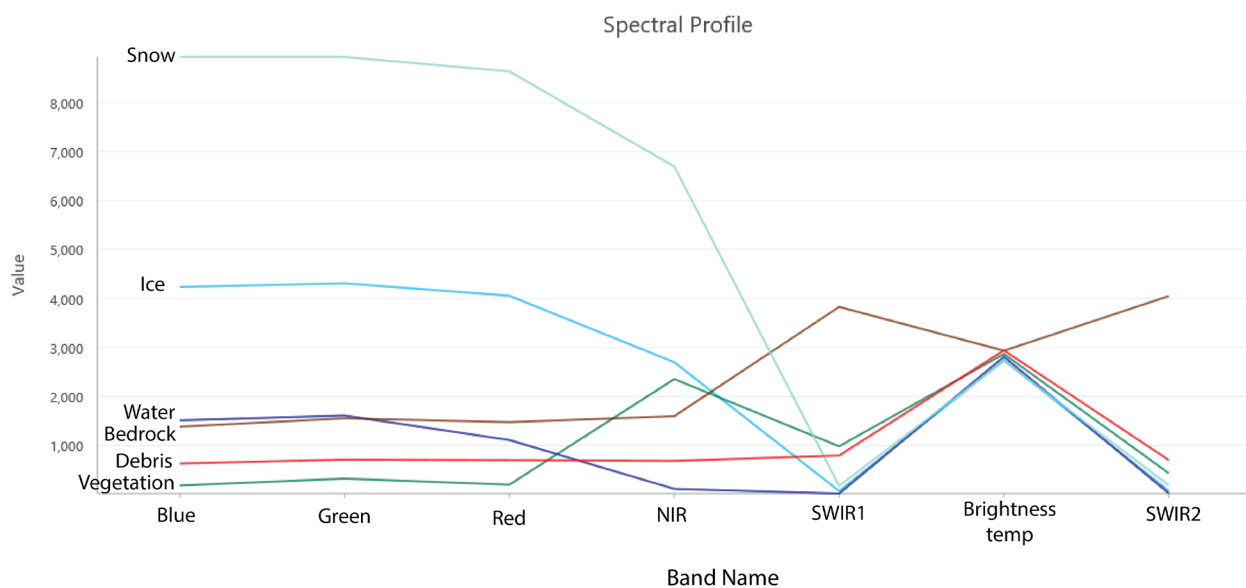

**Fig. S4.** Example spectral profiles for each landcover type (snow, ice, water, bedrock, debris, and vegetation) used in supervised classification.



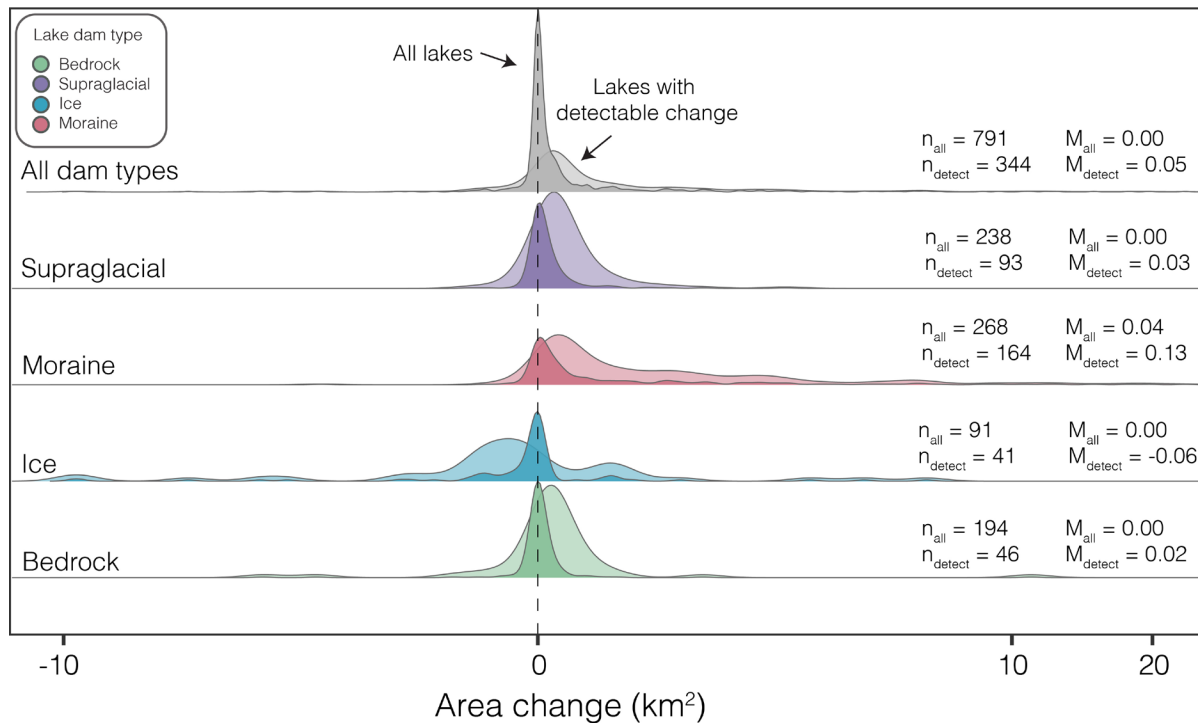

**Fig. S5.** Smoothed density distribution (normalized to 1 for each dam type) of absolute lake area change for all lakes (dark curves) and lakes with detectable change (light curves) for each dam type, with number of lakes ( $n$ ) and median lake area change ( $M$ ).

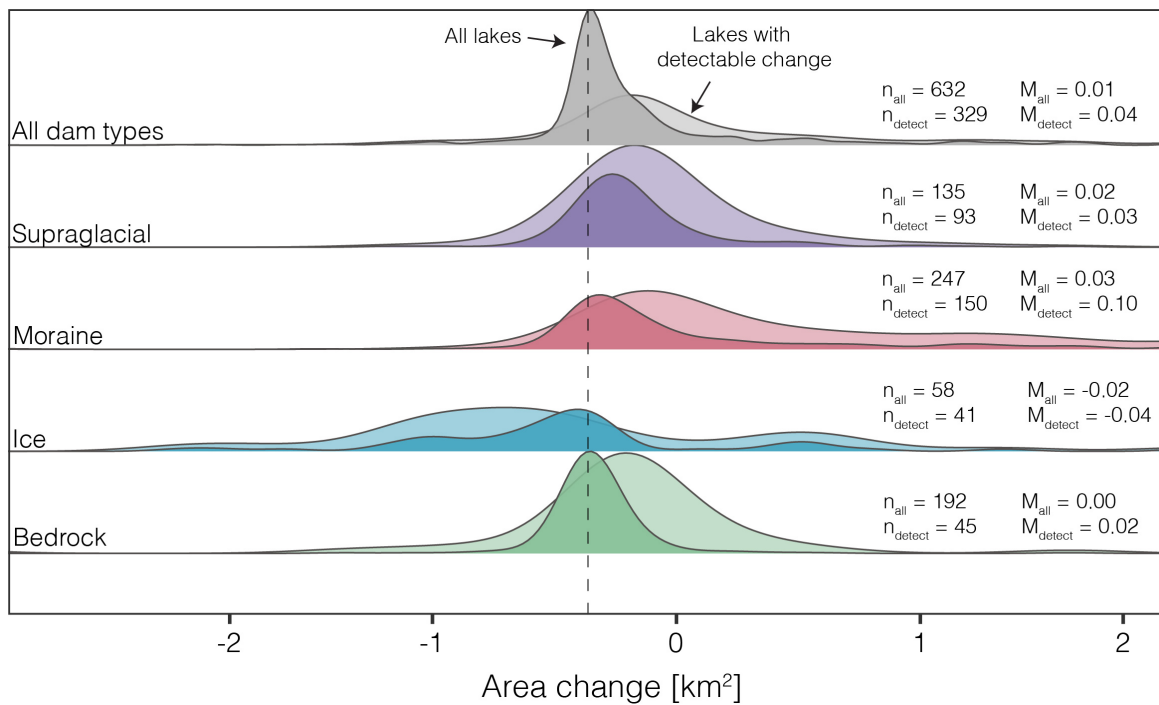

**Fig. S6.** Smoothed density distribution (normalized to 1 for each dam type) of absolute lake area change for all lakes with an area less than  $10 \text{ km}^2$  in 2016–2019 (dark curves) and lakes with detectable change (light curves) for each dam type, with number of lakes ( $n$ ) and median lake area change ( $M$ ). Note that the x-axis has been limited to  $-2$  and  $2 \text{ km}^2$ .

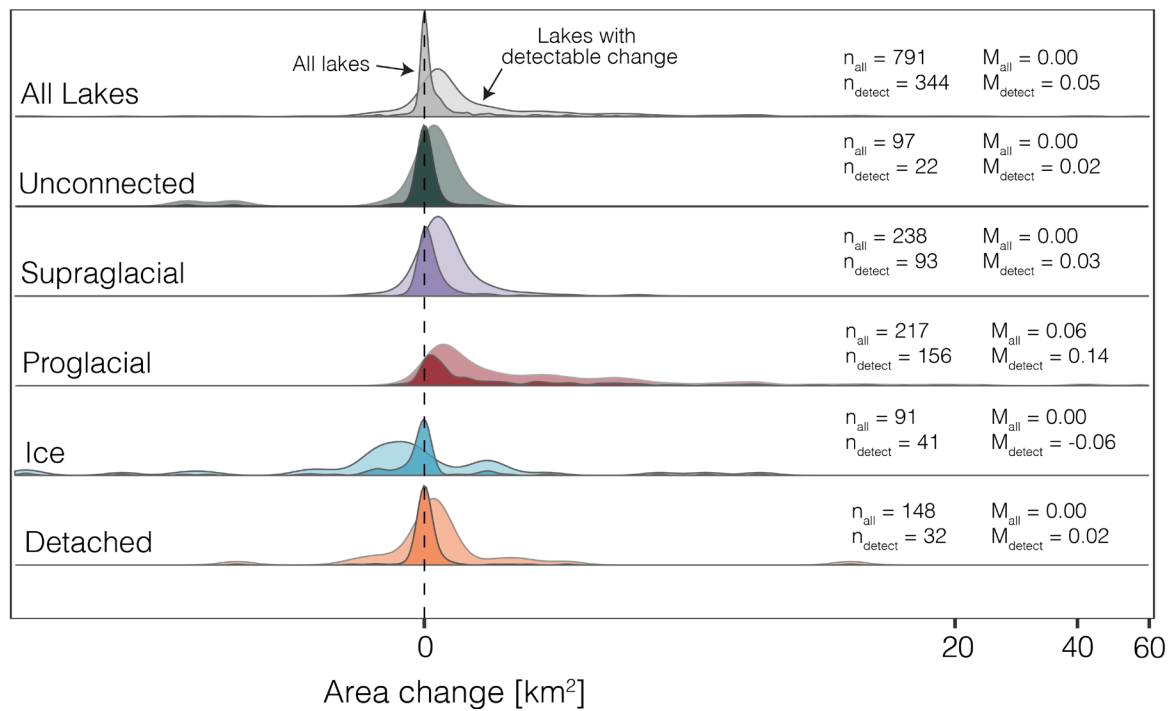

**Fig. S7.** Distribution of lake area change (km²) for all lakes (dark curves) and lakes with detectable change (light curves) for each topological position, with number of lakes (n) and median lake area change (M).

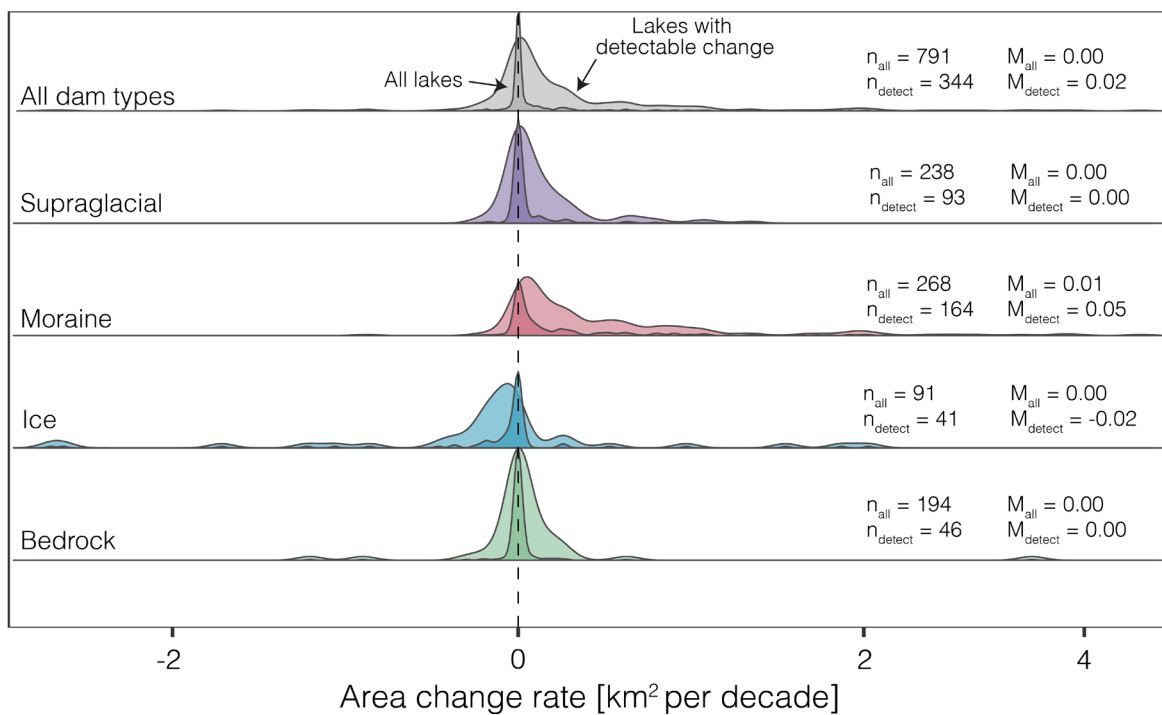

**Fig. S8:** Distribution of lake area change rate (km² per decade) for all lakes (dark curves) and lakes with detectable change (light curves) for each dam type, with number of lakes (n) and median lake area change (M).

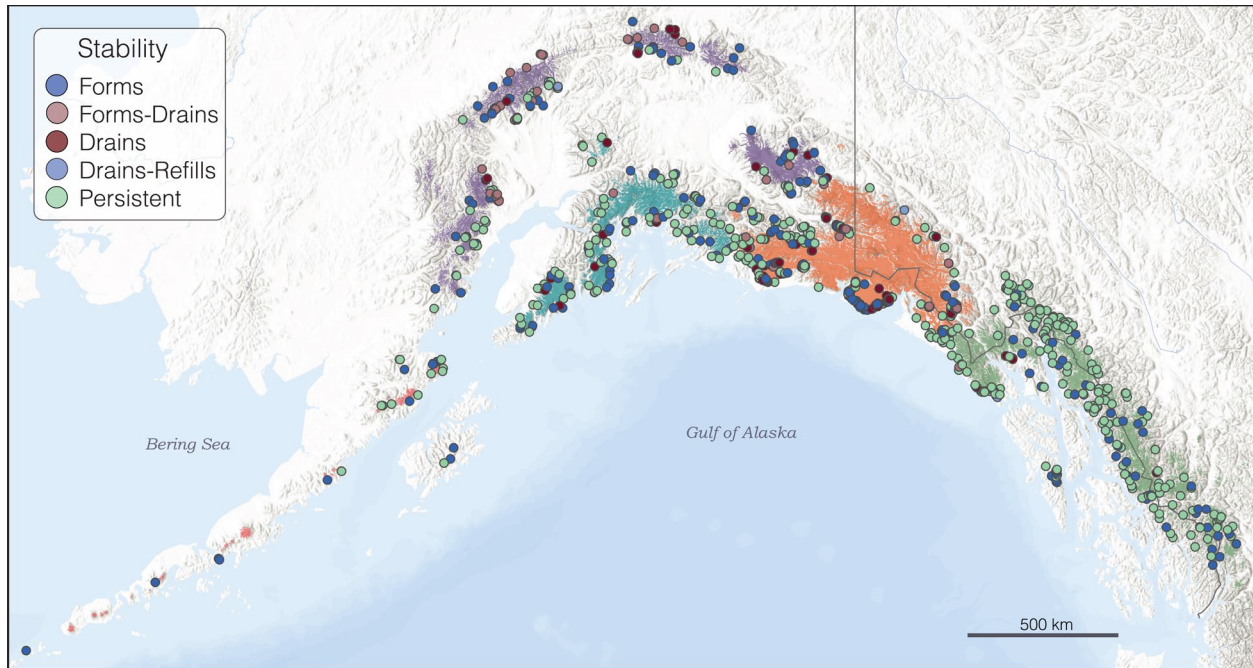

**Fig. S9.** Lake stability distribution across Alaska. Each dot represents an individual lake. Colored areas refer to the RGI subregions (see Fig. 1) (basemap provided by ESRI, 2021).

**Table S1:** Attributes of the 19 lakes with area greater than 10 km<sup>2</sup>.

| LakeID             | GlacierName           | Area 1984-1988(km <sup>2</sup> ) | Area 1997-2001(km <sup>2</sup> ) | Area 2007-2011(km <sup>2</sup> ) | Area 2016-2019(km <sup>2</sup> ) | Position   | Dam Type | Elevation (m) | <2 m asl | PiedmontBasin | O2Region | Stability  | Area Change 1984-2016(km <sup>2</sup> ) | Change Rate (km <sup>2</sup> /decade) |
|--------------------|-----------------------|----------------------------------|----------------------------------|----------------------------------|----------------------------------|------------|----------|---------------|----------|---------------|----------|------------|-----------------------------------------|---------------------------------------|
| RG160-01.10006n50  | Colony Glacier        | 25.43                            | 26.35                            | 26.73                            | 27.71                            | proglacial | moraine  | 62.00         | N        | Y             | 4        | Persistent | 2.28                                    | 0.71                                  |
| RG160-01.13538n432 | Tana Glacier          | 1.45                             | 2.93                             | 1.93                             | 13.31                            | proglacial | moraine  | 481.00        | N        | N             | 5        | Persistent | 11.86                                   | 3.71                                  |
| RG160-01.13531n428 | Miles Glacier         | 31.62                            | 40.07                            | 31.22                            | 40.26                            | proglacial | moraine  | 39.00         | N        | Y             | 5        | Persistent | 8.64                                    | 2.70                                  |
| RG160-01.14883n431 | Steller Glacier       | 21.98                            | 16.32                            | 17.15                            | 12.78                            | ice        | ice      | 132.00        | N        | N             | 5        | Persistent | -9.20                                   | -2.88                                 |
| RG160-01.14883n430 | Steller Glacier       | 10.11                            | 15.77                            | 15.95                            | 22.58                            | proglacial | moraine  | 8.00          | N        | Y             | 5        | Persistent | 12.48                                   | 3.90                                  |
| RG160-01.16545n457 | Lowell Glacier        | 7.52                             | 11.19                            | 18.47                            | 22.51                            | proglacial | moraine  | 514.00        | N        | Y             | 5        | Persistent | 14.99                                   | 4.68                                  |
| RG160-01.13635n325 | Bering Glacier        | 91.19                            | 87.38                            | 143.11                           | 131.82                           | proglacial | moraine  | 0.00          | Y        | Y             | 5        | Persistent | 40.63                                   | 12.70                                 |
| RG160-01.09471n48  | Excelsior Glacier     | 7.94                             | 11.59                            | 14.74                            | 17.31                            | proglacial | moraine  | 0.25          | Y        | Y             | 4        | Persistent | 9.37                                    | 2.93                                  |
| RG160-01.17803n310 | Bear Glacier          | 7.98                             | 10.57                            | 17.08                            | 18.61                            | proglacial | moraine  | 0.00          | Y        | Y             | 4        | Persistent | 10.63                                   | 3.32                                  |
| RG160-01.12645n433 | East Yakutat Glacier  | 53.84                            | 61.52                            | 62.84                            | 96.61                            | proglacial | moraine  | 28.00         | N        | Y             | 5        | Persistent | 42.77                                   | 13.37                                 |
| RG160-01.13696n454 | Malaspina Glacier     | 30.08                            | 43.43                            | 72.51                            | 87.03                            | proglacial | moraine  | 1.80          | Y        | Y             | 5        | Persistent | 56.95                                   | 17.80                                 |
| RG160-01.21081n455 | Alsek Lake            | 45.75                            | 55.64                            | 61.95                            | 69.27                            | proglacial | moraine  | 21.00         | N        | Y             | 6        | Persistent | 23.52                                   | 7.35                                  |
| RG160-01.01514n459 | Twin Glacier Lake     | 12.04                            | 12.44                            | 12.54                            | 12.53                            | proglacial | moraine  | 6.00          | N        | Y             | 6        | Persistent | 0.49                                    | 0.15                                  |
| RG160-01.04532n319 | NA                    | 4.74                             | 5.36                             | 6.83                             | 11.07                            | proglacial | moraine  | 105.00        | N        | Y             | 6        | Persistent | 6.33                                    | 1.98                                  |
| RG160-01.03741n51  | Great Glacier         | 11.60                            | 12.83                            | 13.58                            | 13.60                            | proglacial | moraine  | 18.00         | N        | Y             | 6        | Persistent | 1.99                                    | 0.62                                  |
| RG160-01.01522n703 | Llewellyn Glacier     | 4.82                             | 7.30                             | 9.73                             | 11.34                            | proglacial | moraine  | 702.00        | N        | N             | 6        | Persistent | 6.52                                    | 2.04                                  |
| RG160-01.20748n688 | NA                    | 12.58                            | 24.95                            | 29.05                            | 30.41                            | proglacial | moraine  | 193.00        | N        | N             | 6        | Persistent | 17.83                                   | 5.57                                  |
| RG160-01.20985n434 | Grand Plateau Glacier | 25.27                            | 33.05                            | 39.07                            | 44.94                            | proglacial | moraine  | 22.00         | N        | Y             | 6        | Persistent | 19.67                                   | 6.15                                  |
| RG160-01.12397n47  | Barrier Glacier       | 74.36                            | 79.45                            | 82.67                            | 85.35                            | detached   | bedrock  | 346.00        | N        | N             | 2        | Persistent | 10.99                                   | 3.44                                  |
